# Supplementary material for: The CRL4DCAF1 cullin‐RING ubiquitin ligase is activated following a switch in oligomerization state
Source: PubMed Central journal article supplement — EMBO J. 2021 Sep 30;40(22):e108008. doi: 10.15252/embj.2021108008 (PMC8591539; doi:10.15252/embj.2021108008), 2021-09-30

**C**

|        |      |   |   |    |    |
|--------|------|---|---|----|----|
| UBE1   | +    | + | + | +  | +  |
| Ubq    | +    | + | + | +  | +  |
| UbcH5a | -    | + | + | +  | +  |
|        | 0    | 5 | 8 | 12 | 15 |
|        | Min. |   |   |    |    |

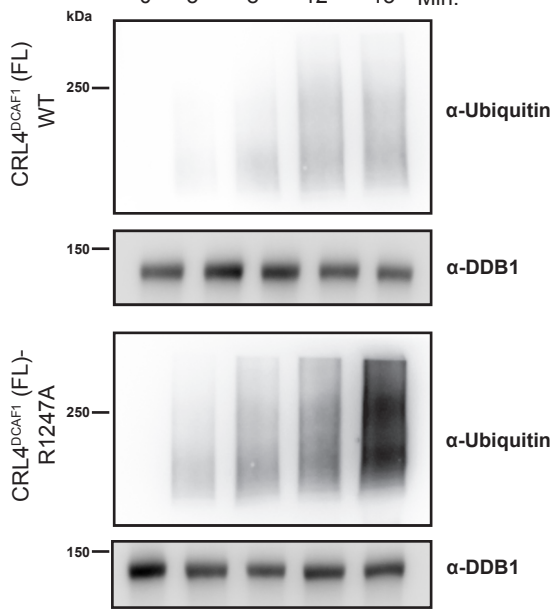

CRL4<sup>DCAF1</sup> (FL)  
WT

CRL4<sup>DCAF1</sup> (FL)-  
R1247A

|        |   |   |   |    |    |      |   |   |   |    |    |
|--------|---|---|---|----|----|------|---|---|---|----|----|
| UBE1   | + | + | + | +  | +  |      | + | + | + | +  | +  |
| Ubq    | + | + | + | +  | +  |      | + | + | + | +  | +  |
| UbcH5a | - | + | + | +  | +  |      | - | + | + | +  | +  |
|        | 0 | 5 | 8 | 12 | 15 | Min. | 0 | 5 | 8 | 12 | 15 |
|        |   |   |   |    |    | Min. |   |   |   |    |    |

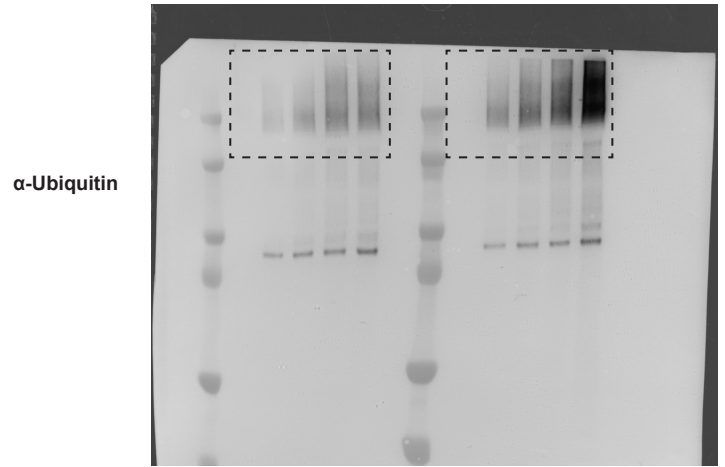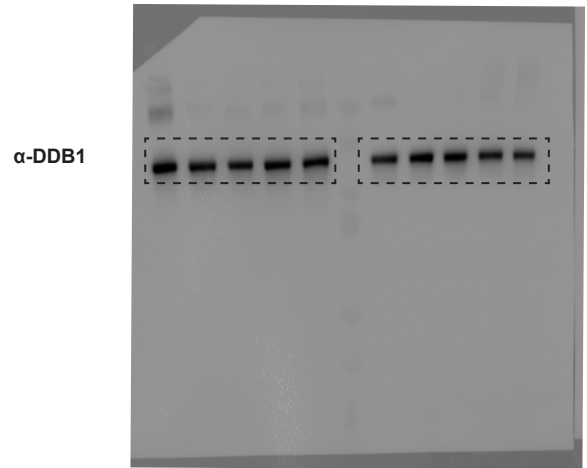

**D**

|        |      |   |   |   |    |    |
|--------|------|---|---|---|----|----|
| UBE1   | +    | + | + | + | +  | +  |
| Ubq    | +    | + | + | + | +  | +  |
| UbcH5a | +    | + | + | + | +  | +  |
| UNG2   | -    | + | + | + | +  | +  |
|        | 0    | 1 | 2 | 5 | 10 | 15 |
|        | Min. |   |   |   |    |    |

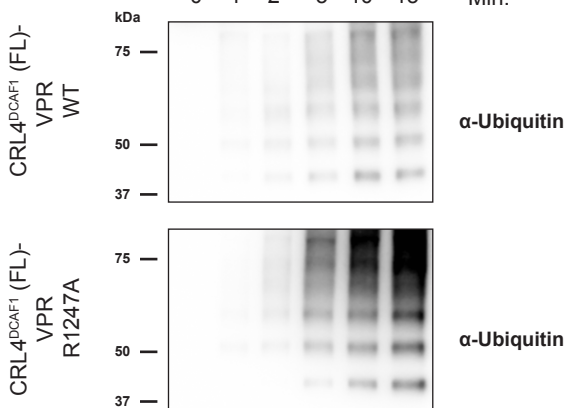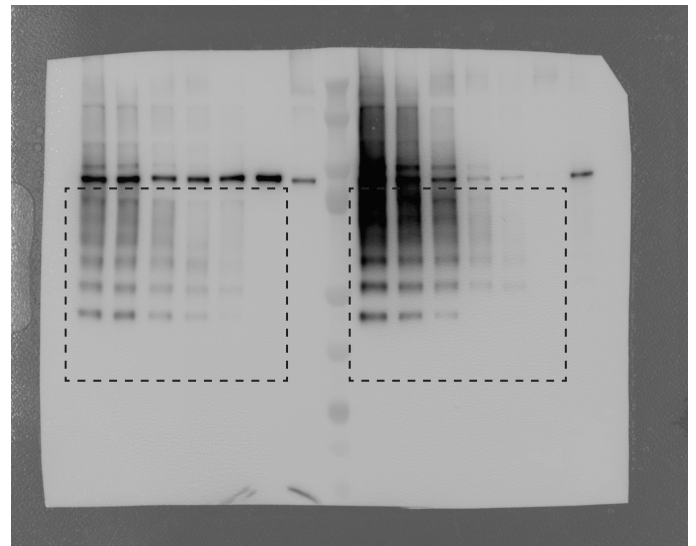

Supplement: EMBJ-40-e108008-s008.pdf [file EMBJ-40-e108008-s008.pdf]
