# Supplementary figures and images for: The CRL4DCAF1 cullin‐RING ubiquitin ligase is activated following a switch in oligomerization state
Source: PubMed Central journal article supplement — EMBO J. 2021 Sep 30;40(22):e108008. doi: 10.15252/embj.2021108008 (PMC8591539; doi:10.15252/embj.2021108008), 2021-09-30

**A**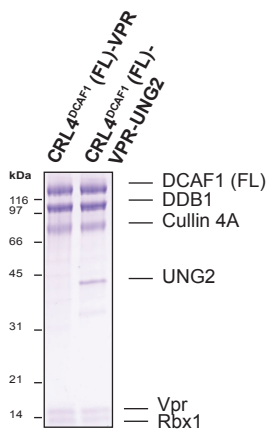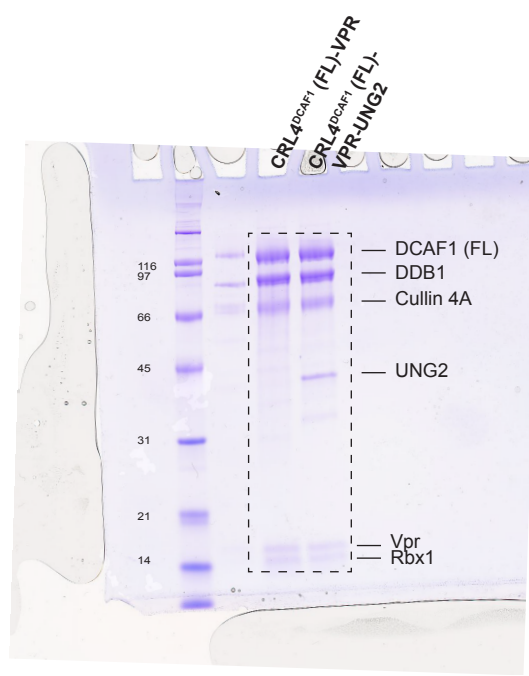**D**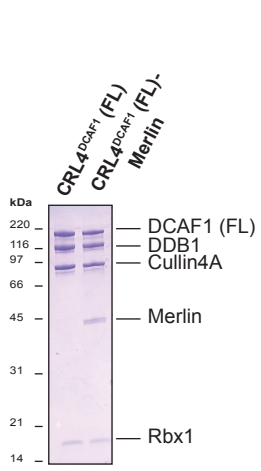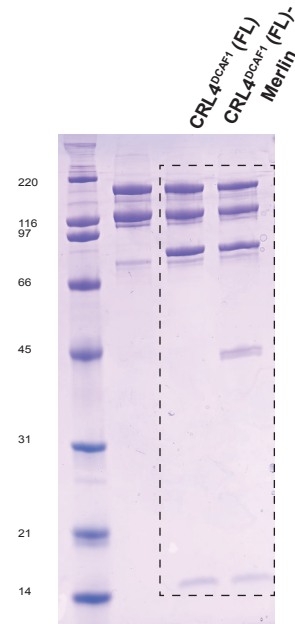

Supplement: EMBJ-40-e108008-s002.pdf [file EMBJ-40-e108008-s002.pdf]

**B**

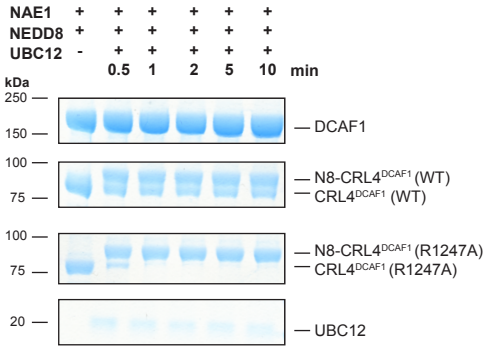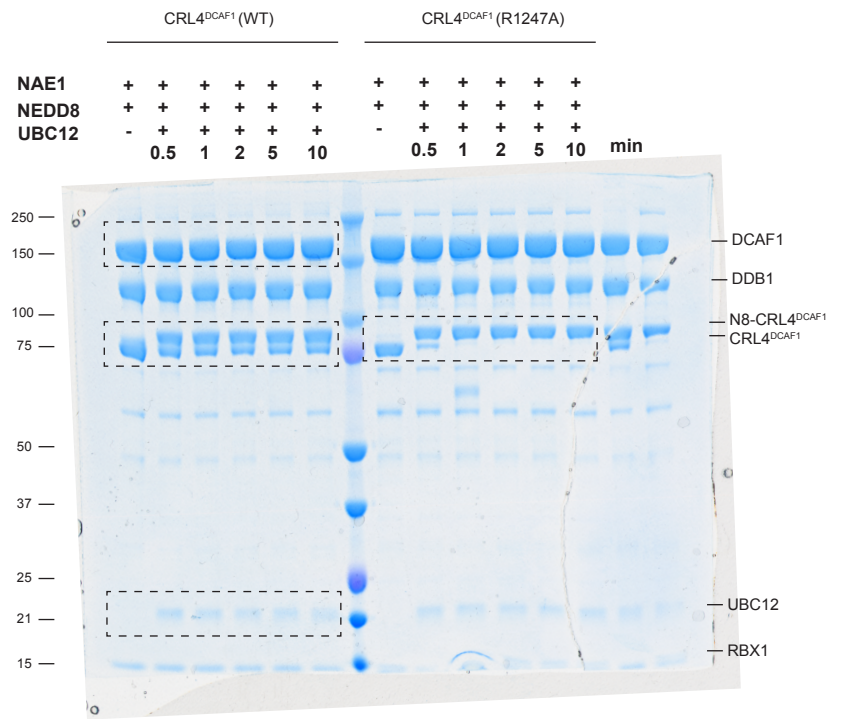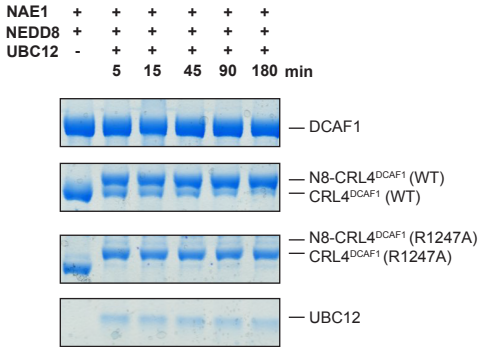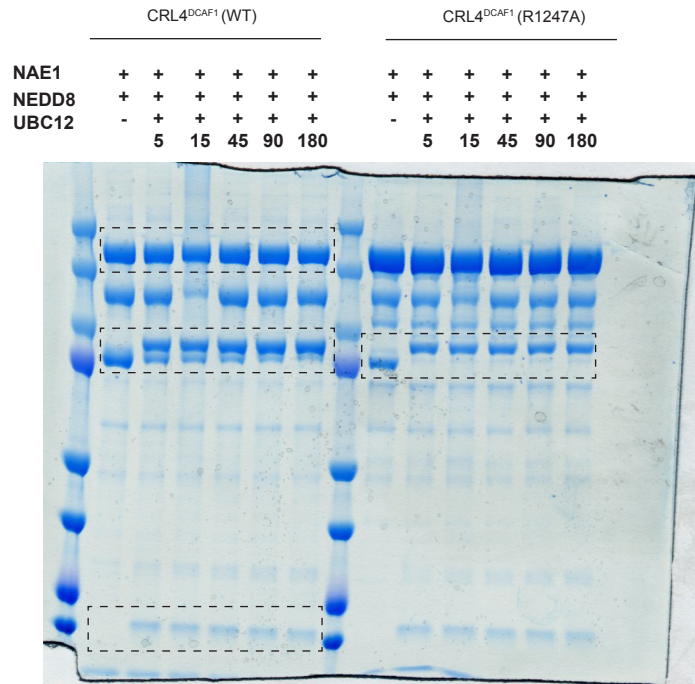

Supplement: EMBJ-40-e108008-s006.pdf [file EMBJ-40-e108008-s006.pdf]
